# Supplementary material for: Effect of Resin Acid and Zinc Oxide on Immune Status of Weaned Piglets Challenged With E. coli Lipopolysaccharide
Source: PubMed Central journal article supplement (PMC8733644; doi:10.3389/fvets.2021.761742), 2021-12-23
Supplement: Data_Sheet_1.pdf [file Data_Sheet_1.pdf]

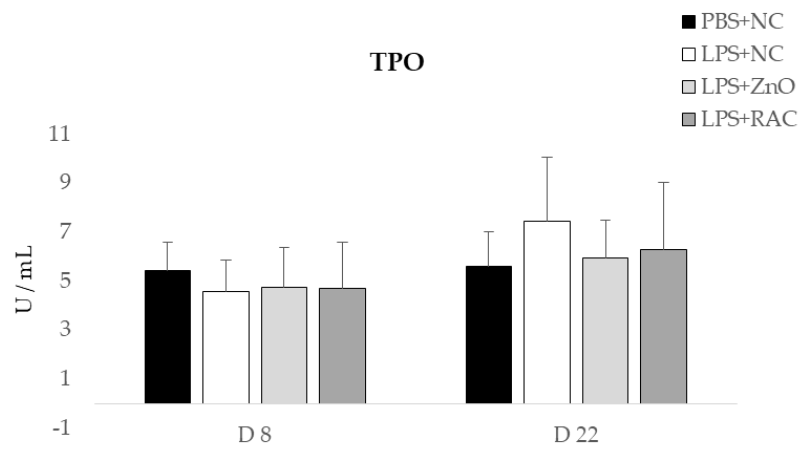

- 1
- 2 **Supplementary Figure 1.** Total peroxidase (TPO) activity (units/g faeces) of piglets from the
- 3 PBS+NC, LPS+NC, LPS + ZnO and LPS + RAC groups.<sup>1</sup>
- 4 <sup>1</sup> Faecal samples were collected from all the piglets (n=48) at days 8 and 22 (i.e. the day after the
- 5 challenge).
- 6

7 **Supplementary Table 1.** Composition (%) and calculated nutrient levels (g/kg) of the experimental  
8 diets.

| <b>Ingredients</b>                 | <b>Units</b> | <b>Diet A</b> | <b>Diet B</b> | <b>Diet C</b> |
|------------------------------------|--------------|---------------|---------------|---------------|
| Potato protein                     | %            | 3.23          | 3.23          | 3.23          |
| Barley                             | %            | 25.00         | 25.00         | 25.00         |
| Maize                              | %            | 30.00         | 30.00         | 30.00         |
| Maize gluten ml 60% CP             | %            | 5.00          | 5.00          | 5.00          |
| Molasses cane>47.5% su             | %            | 1.00          | 1.00          | 1.00          |
| Soybean oil                        | %            | 1.00          | 1.00          | 1.00          |
| Soya bean meal47% CP               | %            | 7.50          | 7.50          | 7.50          |
| Wheat                              | %            | 9.64          | 9.64          | 9.64          |
| Monocalcium phosphate              | %            | 0.34          | 0.34          | 0.34          |
| Whey p.delac 18% ash               | %            | 11.81         | 11.81         | 11.81         |
| Salt                               | %            | 0.50          | 0.50          | 0.50          |
| Sunflower seed meal 38% CP         | %            | 2.00          | 2.00          | 2.00          |
| Lysine-HCl (L 79%)                 | %            | 0.21          | 0.21          | 0.21          |
| Methionine (DL 99%)                | %            | 0.05          | 0.05          | 0.05          |
| Threonine (L 98%)                  | %            | 0.02          | 0.02          | 0.02          |
| Lys+trypt premix                   | %            | 0.77          | 0.77          | 0.77          |
| Limestone                          | %            | 1.32          | 1.32          | 1.32          |
| Premix                             | %            | 0.60          | 0.60          | 0.60          |
| Zinc oxide (ZnO)                   | mg/kg        | -             | 2500          | -             |
| Resin acid concentrate (RAC)*      | mg/kg        | -             | -             | 200           |
| <b>Calculated nutrients (g/kg)</b> |              |               |               |               |
| Net energy                         | MJ/kg        | 9.86          | 9.86          | 9.86          |
| Dry matter                         | g/kg         | 939           | 939           | 939           |
| Ash                                | g/Kg         | 60.85         | 60.85         | 60.85         |
| Crude protein                      | g/Kg         | 189.28        | 189.28        | 189.28        |
| Crude fibre                        | g/Kg         | 23.42         | 23.42         | 23.42         |
| Sugar                              | g/Kg         | 78.73         | 78.73         | 78.73         |
| Starch                             | g/Kg         | 385.31        | 385.31        | 385.31        |
| SID_LYSs                           | g/Kg         | 11.12         | 11.12         | 11.12         |
| SID_METs                           | g/Kg         | 3.65          | 3.65          | 3.65          |
| SID_M+Cs                           | g/Kg         | 6.53          | 6.53          | 6.53          |
| SID_THRs                           | g/Kg         | 7.00          | 7.00          | 7.00          |
| SID_TRPs                           | g/Kg         | 2.16          | 2.16          | 2.16          |
| SID_ARGs                           | g/Kg         | 8.18          | 8.18          | 8.18          |
| SID_ILEs                           | g/Kg         | 7.23          | 7.23          | 7.23          |
| SID_VALs                           | g/Kg         | 8.26          | 8.26          | 8.26          |
| SID_HISs                           | g/Kg         | 3.83          | 3.83          | 3.83          |
| SID_ALAs                           | g/Kg         | 8.75          | 8.75          | 8.75          |
| SID_ASFs                           | g/Kg         | 14.19         | 14.19         | 14.19         |
| SID_GLUs                           | g/Kg         | 31.11         | 31.11         | 31.11         |
| SID_GLYs                           | g/Kg         | 5.72          | 5.72          | 5.72          |
| SID_LEUs                           | g/Kg         | 16.63         | 16.63         | 16.63         |
| SID_PHEs                           | g/Kg         | 8.42          | 8.42          | 8.42          |
| SID_PROs                           | g/Kg         | 12.19         | 12.19         | 12.19         |
| SID_SERs                           | g/Kg         | 8.18          | 8.18          | 8.18          |

|    | <u>SID_TYRs</u>                                                                                   | <u>g/Kg</u> | <u>6.40</u> | <u>6.40</u> | <u>6.40</u> |
|----|---------------------------------------------------------------------------------------------------|-------------|-------------|-------------|-------------|
| 9  | * RAC is a feed additive powder with 37.5% resin acids dried onto 62.5% of food grade whole grain |             |             |             |             |
| 10 | wheat flour, produced by Hankkija Oy (Hyvinkää, Finland).                                         |             |             |             |             |
